# Supplementary material
Source: Springer Nature journal article supplement (https://www.springermedizin.de/resource/supplementary/12885_2011_2742_MOESM6_ESM.pdf/9461848)

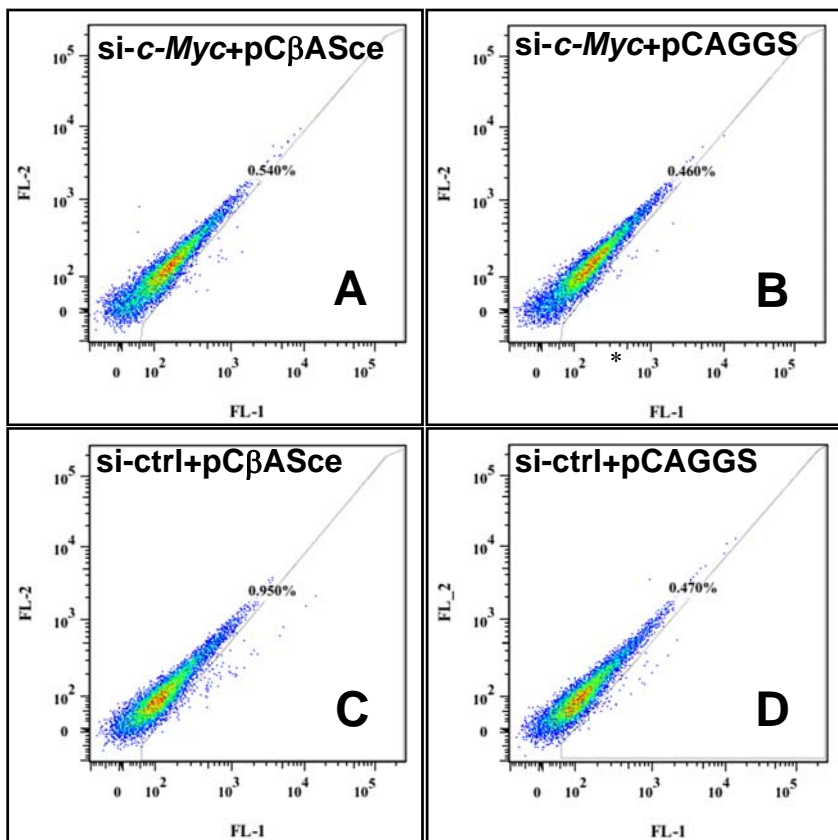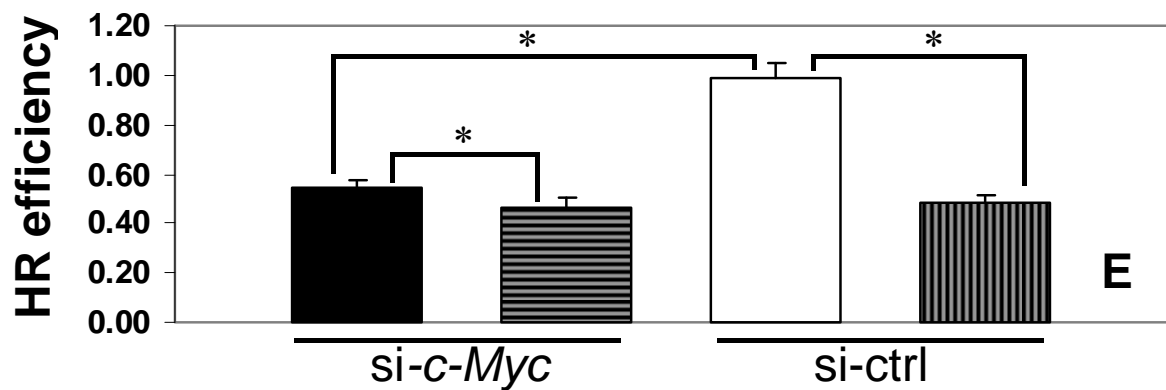

|                                 | <b>A</b> | <b>B</b> | <b>C</b> | <b>D</b> |
|---------------------------------|----------|----------|----------|----------|
| <b>pDR-GFP</b>                  | +        | +        | +        | +        |
| <b>pC<math>\beta</math>ASce</b> | +        | -        | +        | -        |
| <b>pCAGGS</b>                   | -        | +        | -        | +        |

Supplement: MOESM6 [file 9461848]
